# Supplementary material for: Characterization of the starch-acting MaAmyB enzyme from Microbacterium aurum B8.A representing the novel subfamily GH13_42 with an unusual, multi-domain organization
Source: PubMed Central journal article supplement (PMC5093618; doi:10.1038/srep36100), 2016-11-03
Supplement: srep36100-s1.pdf [file srep36100-s1.pdf]

Characterization of the starch-acting MaAmyB enzyme from *Microbacterium aurum* B8.A representing the novel subfamily GH13\_42 with an unusual, multi-domain organization

Vincent Valk<sup>1,2</sup>, Rachel M. van der Kaaij<sup>1</sup>, and Lubbert Dijkhuizen<sup>1\*</sup>

<sup>1</sup>Microbial Physiology, Groningen Biomolecular Sciences and Biotechnology Institute (GBB), University of Groningen, The Netherlands

<sup>2</sup>Top Institute of Food and Nutrition (TIFN), Nieuwe Kanaal 9A, 6709 PA, Wageningen, The Netherlands

\*Corresponding author: [L.Dijkhuizen@rug.nl](mailto:L.Dijkhuizen@rug.nl)

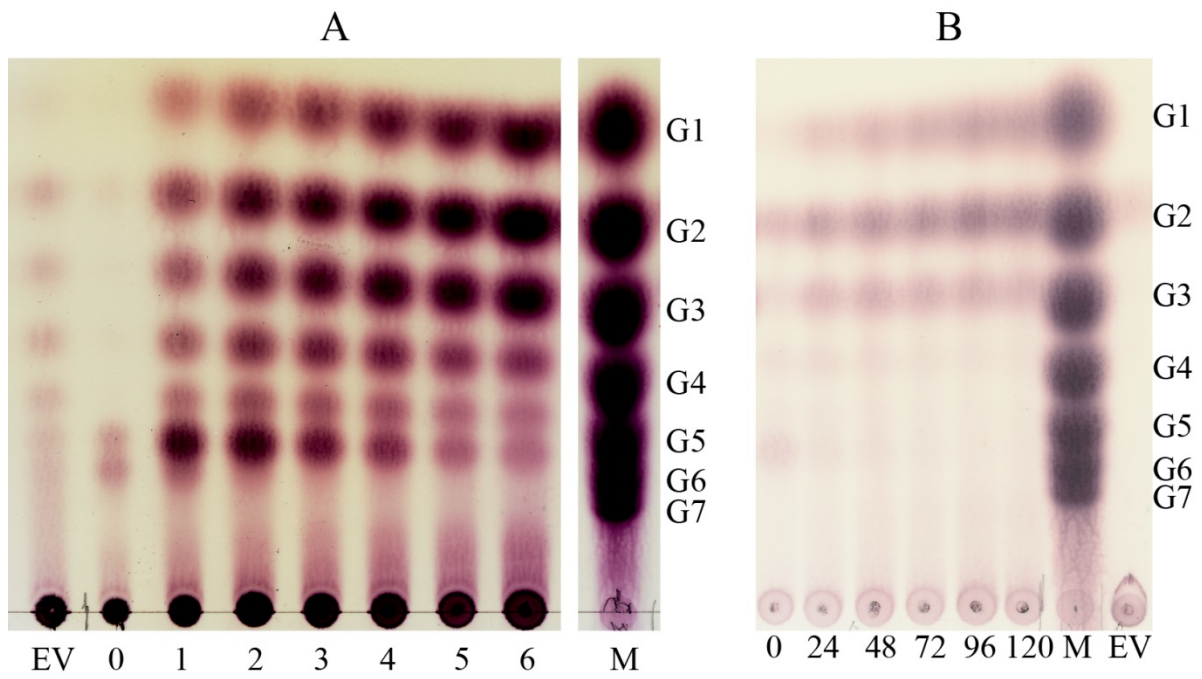

Figure S1. TLC analysis of MaAmyB products obtained in time by incubation of the enzyme (155 U, CNP assay) with maltoheptaose up to 6 h (A) or granular wheat starch up to 120 h (B). EV = empty vector control incubated for 6 h. M = markers, size consisting of G1-G7 (glucose; maltose; maltotriose; maltotetraose; maltopentaose; maltohexaose; maltoheptaose).

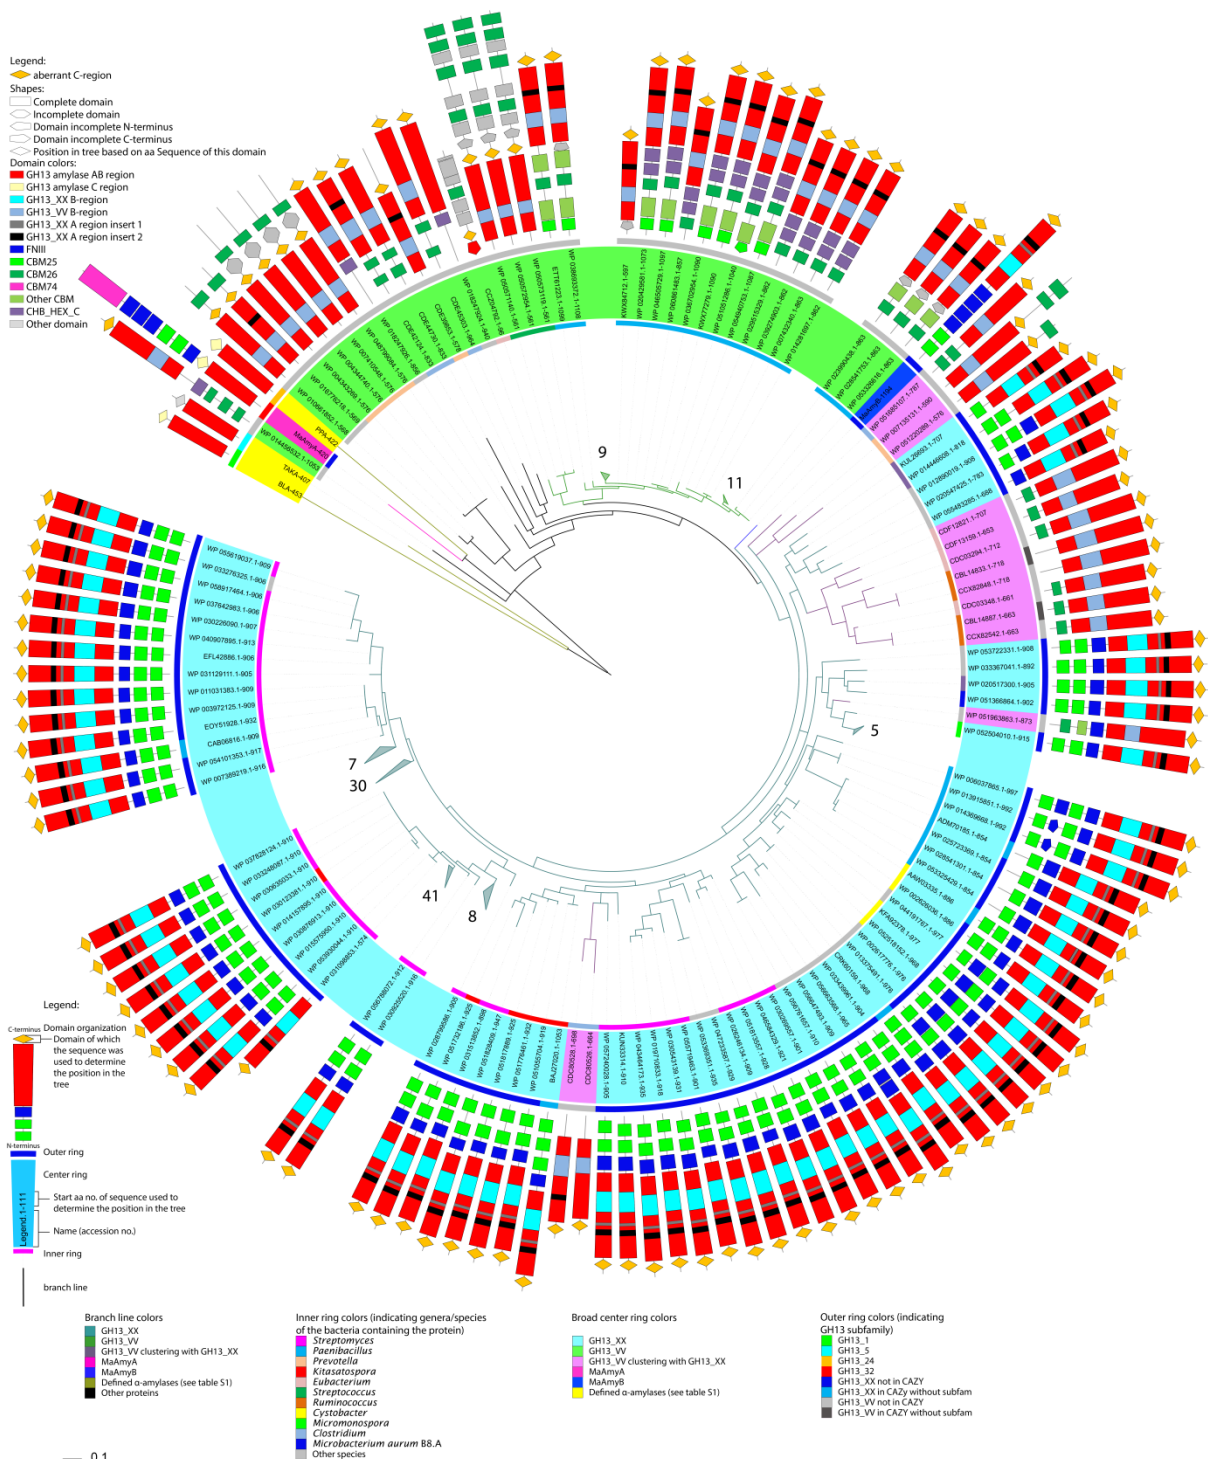

Figure S2. Phylogenetic tree of the 234 aberrant C-regions identified through a BLAST search with the C-region from MaAmyB (aa 1194-1259), three well characterized  $\alpha$ -amylases: Pig pancreatic  $\alpha$ -amylase (PPA) (P00690.3), Taka amylase A from *Aspergillus oryzae* (TAKA) (P0C1B4.1) and *Bacillus licheniformis*  $\alpha$ -amylase (BLA) (P06278.1) as well as MaAmyA (AKG25402.1) which is directly upstream of MaAmyB in the genome of *M. aurum* B8.A. The tree is based on the alignment of the C-regions, indicated by a diamond shape in the domain organization as identified through BLAST searches. Domain organization within the protein is based on a combination of CDD, dbCAN data. The inserts in the AB-regions are indicated based on BLAST results of the identified regions from MaAmyB, as well as the identified B-region from CQR582041 for GH13\_VV. Subfamily information was obtained from the CAZY database. Numbers indicate additional members which are similar to the nearby shown sequences, which have been collapsed to improve the readability of the figure.

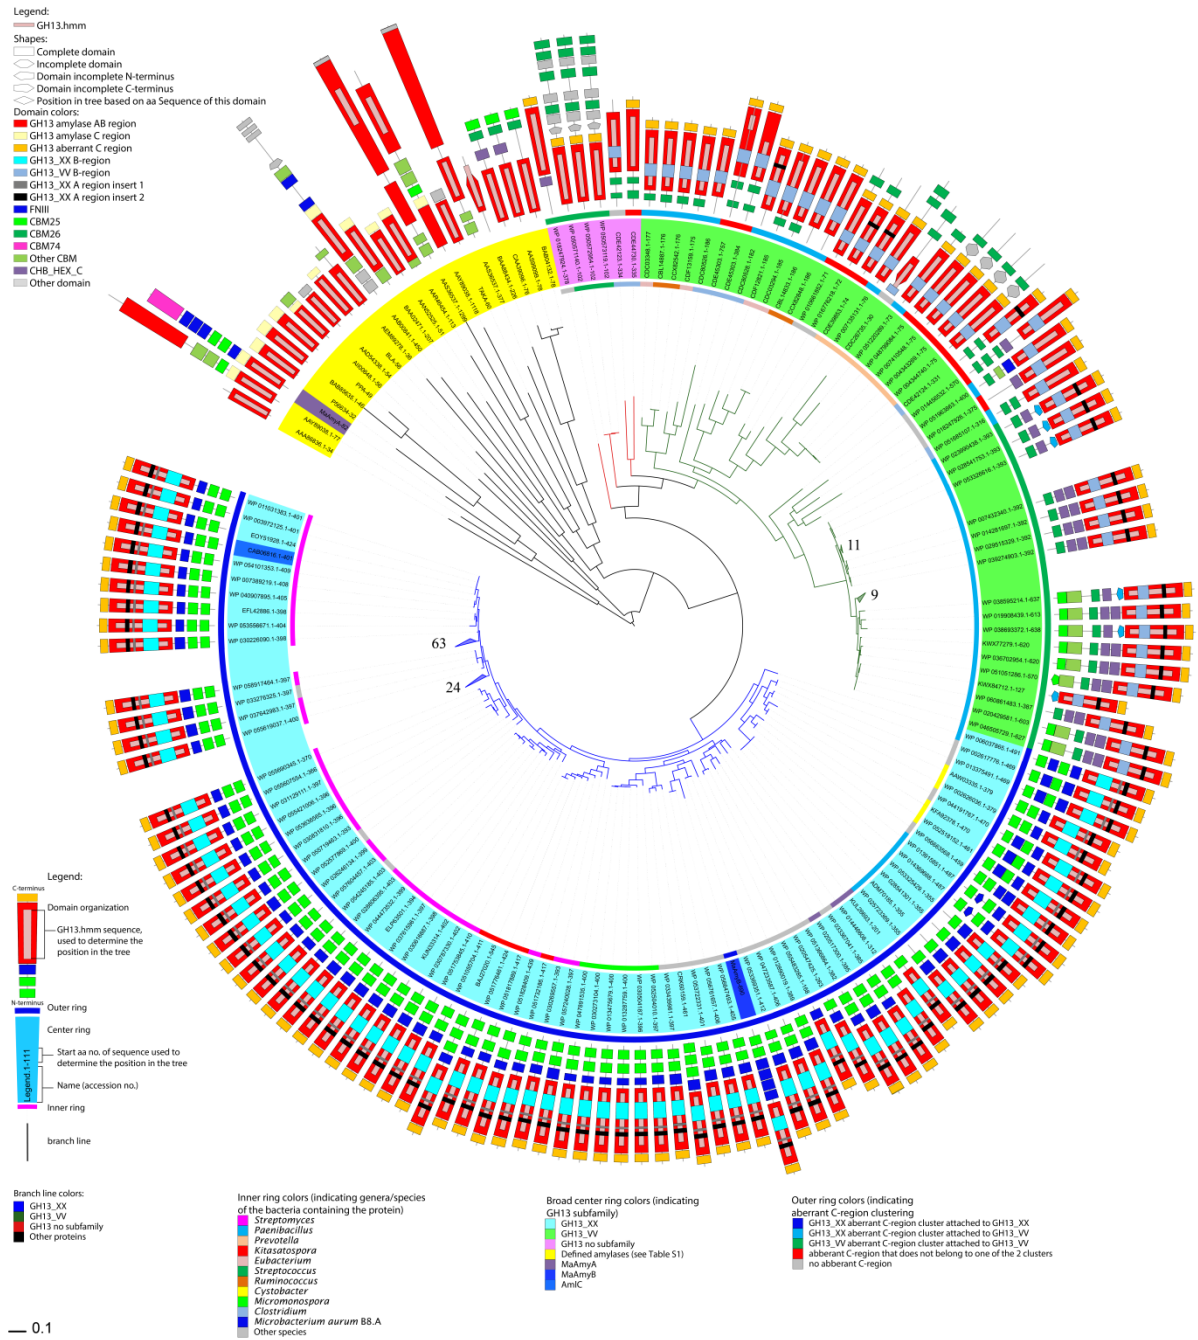

Figure S3. Phylogenetic tree based on the alignment of the catalytic AB-regions (GH13.hmm as obtained from dbCAN) of all 234  $\alpha$ -amylases with the aberrant C-region, 2 additional  $\alpha$ -amylases with a GH13\_VV B-region (CDE42123.1, CDC26735.1) and a selection of members from the defined GH13 subfamilies that are either associated with EC3.2.1.1 or EC3.2.1.98<sup>1</sup> (Table S1). Domain organization within the protein is based on a combination of CDD and dbCAN data. The inserts in the A-, B- and C-regions are indicated based on BLAST results of the identified regions from MaAmyB (Table 1) and [CQR58204.1](#) (Table S2). Species and (sub)family info was obtained from CAZy. Information about clustering of the aberrant C-regions was obtained from Figure S1. Numbers indicate clusters of additional sequences similar to the ones already shown, which have been collapsed to improve the readability of the tree. CBM74 is a novel CBM domain<sup>2</sup>.

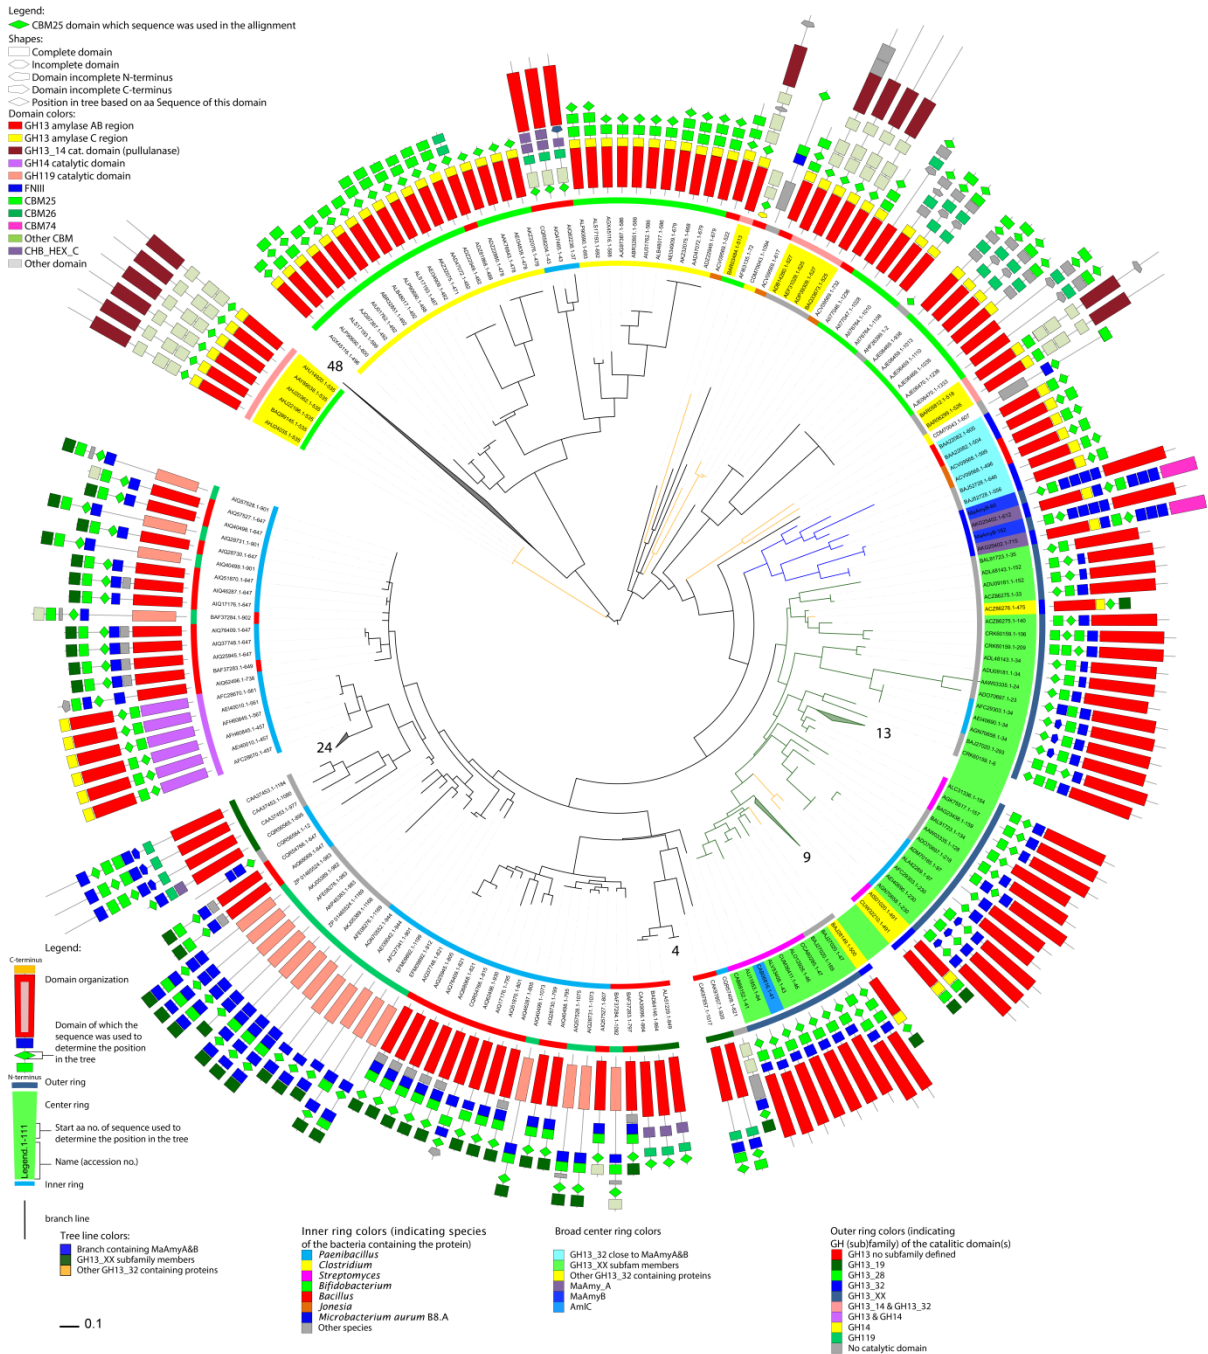

Figure S4. Phylogenetic tree of the 271 CBM25 domains identified by CDD, in proteins that contain CBM25 domains according to CAZy (which listed 275 CBM25 domains) as well as the 2 CBM25 domains from MaAmyB. MaAmyA (AKG25402.1) which is directly upstream of MaAmyB in the genome of *M. aurum* B8.A. is also indicated. The tree is based on an alignment of all CBM25 domains, indicated by a diamond shape in the domain organization. Sequences with multiple CBM25 domains are shown multiple times, once for each CBM25 domain. Domain organization within proteins is based on a combination of CDD and dbCAN data. Genes/species and subfamily information was obtained from the CAZy database. The number 48 indicates the 48 proteins that consist of only a CBM25 domain, not associated with any other protein domains. Other numbers indicate clusters of additional members which are similar to the nearby shown sequences, which are not shown to improve the readability of the tree. The branch containing MaAmyB is shown in blue on the broad ring, GH13\_42 members are indicated by the broad green ring, and other proteins with a GH13\_32 catalytic domain are shown in yellow.

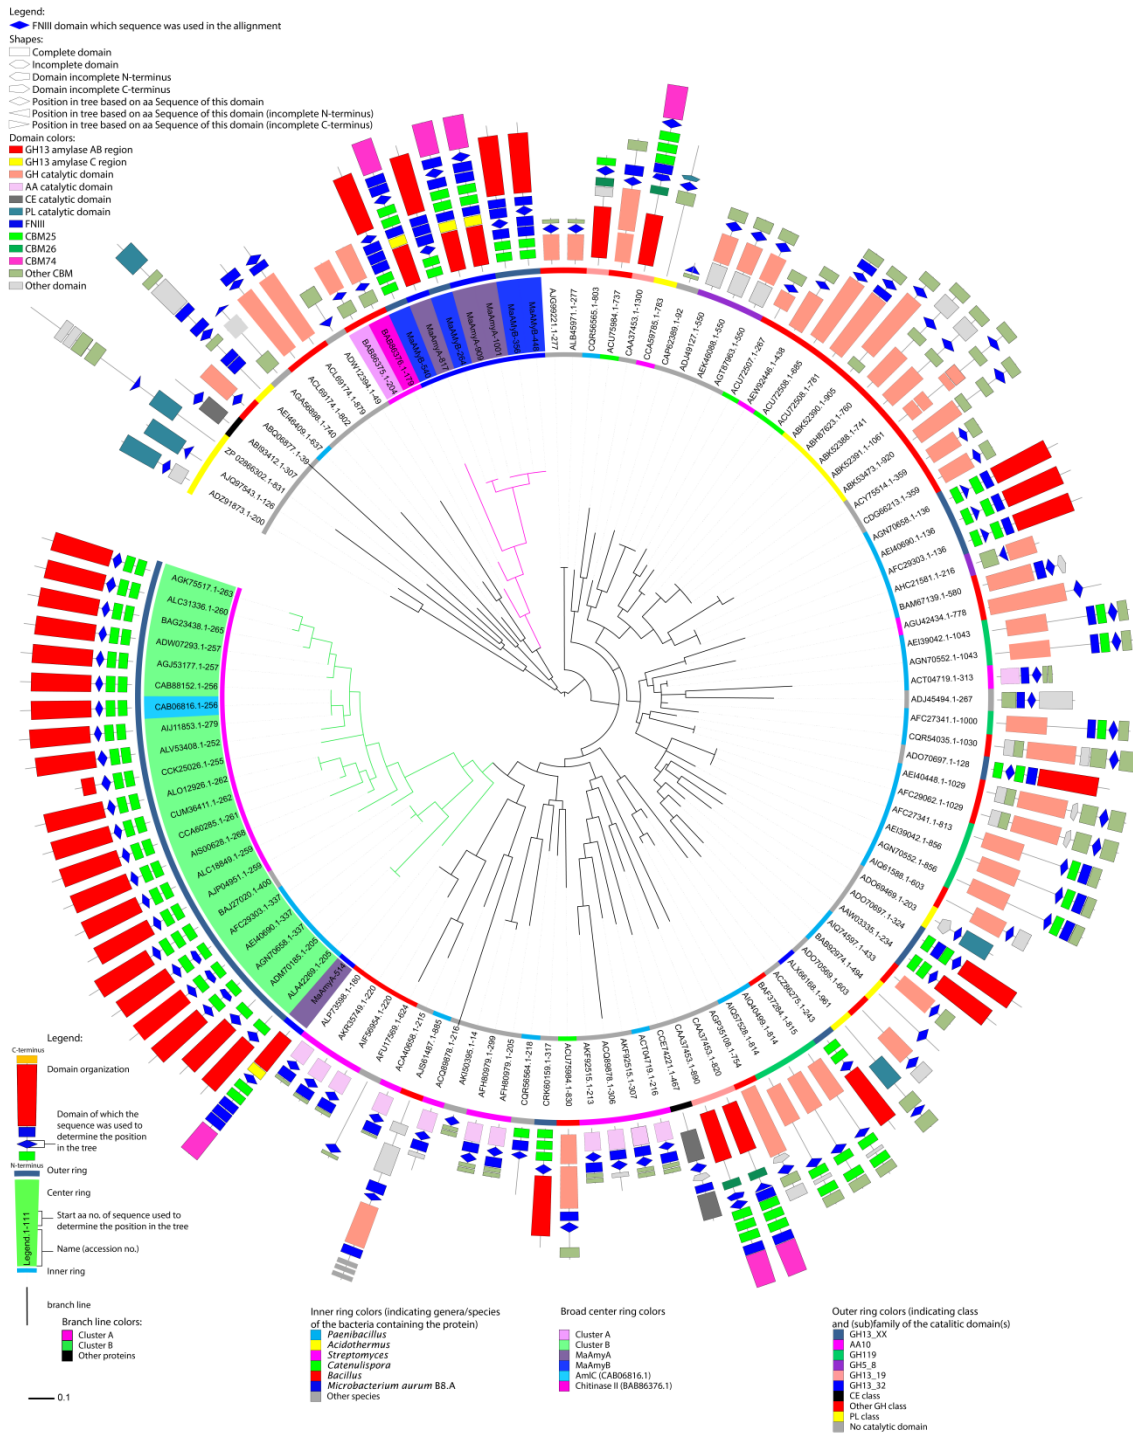

Figure S5. Phylogenetic tree of the FNIII domains identified by CD search (specific hits) in proteins that are listed in CAZy. The selection was based on an initial tree with all FNIII domains identified by CD search in proteins listed in CAZy. MaAmyB and MaAmyA (AKG25402.1), which is directly upstream of MaAmyB in the genome of *M. aurum* B8.A, are indicated. The position in the tree is based on the alignment of the FNIII domain indicated by a diamond shape in the domain organization. Sequences with multiple FNIII domains are shown multiple times, once for each FNIII domain. Domain organization within the proteins is based on a combination of CDD and dbCAN data. Enzyme class, family, subfamily and genus information was obtained from the CAZy database. The branch containing the first FNIII domain of MaAmyA is indicated as cluster A, the branch containing the remaining three FNIII domains of MaAmyA and all FNIII domains of MaAmyB is indicated as cluster B.

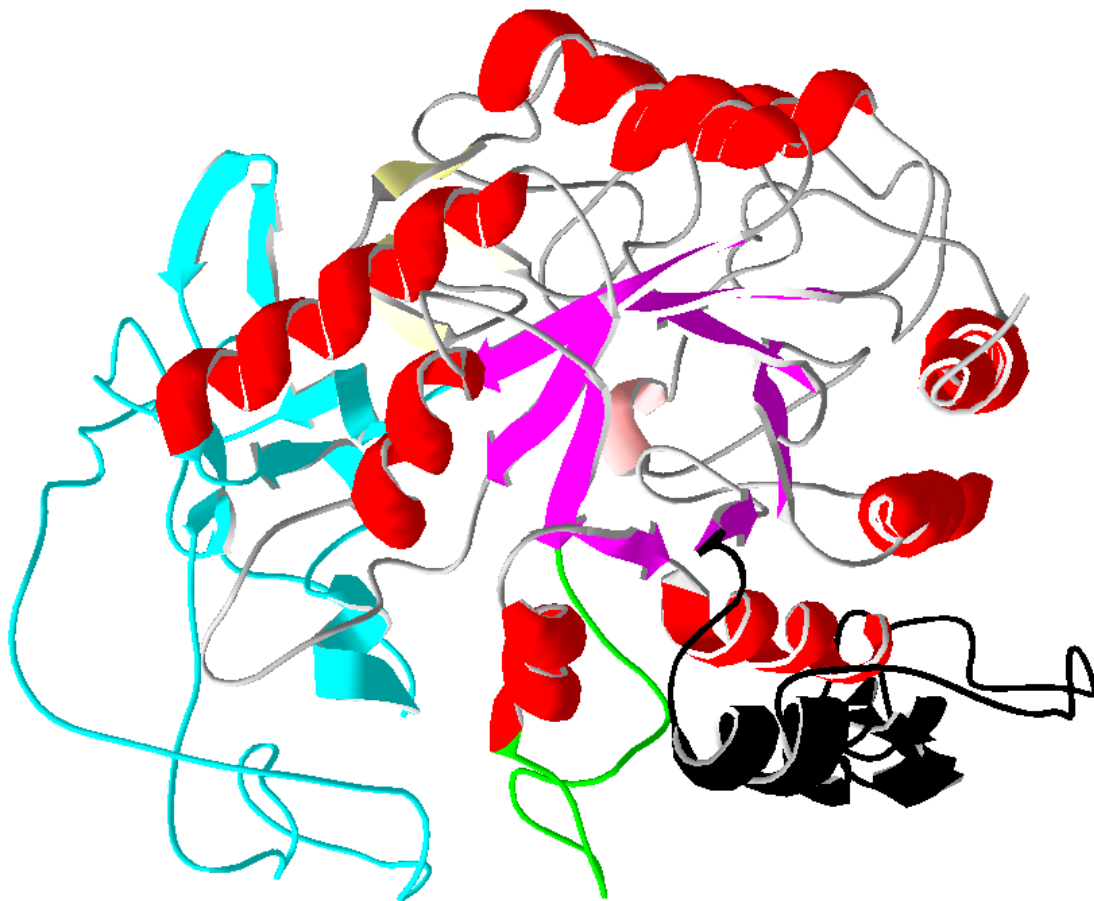

Figure S6. 3D model as predicted by the Phyre2 protein fold recognition server of MaAmyB without C-region. Although the model is less reliable for the exact structure of the inserts, it shows that all inserts are located next to each other, on the same side of the  $(\beta/\alpha)_8$  barrel which may suggest a structural function. The C-region is not shown in the model but it is located on the right side directly above the region indicated in black. Blue = B-region; Green = region between  $\beta_5$  and  $\alpha_5$  containing A-region insert 1; Black = region between  $\alpha_6$  and  $\beta_7$  containing A-region insert 2; Red =  $\alpha$ -helix part of  $(\beta/\alpha)_8$  barrel; Pink =  $\beta$ -sheet part of  $(\beta/\alpha)_8$  barrel; Pale red =  $\alpha$ -helix not part of  $(\beta/\alpha)_8$  barrel; Pale yellow =  $\beta$ -sheet not part of  $(\beta/\alpha)_8$  barrel.

Table S1. Overview of well-known  $\alpha$ -amylases used in the phylogenetic trees shown in Figure 5 and Figure S2. GH13 subfamily, EC number and Organism names were obtained from CAZy<sup>1</sup>. The members shown here were selected after an initial tree with a diverse selection of all (40) GH13 subfamilies was constructed to select the closest related subfamilies for display in the final tree. From these closest subfamilies, characterized members (if available with solved crystal structures) with  $\alpha$ -amylase (EC 3.2.1.1) or  $\alpha$ -glucan 1,4- $\alpha$ -maltohexaosidase activity were selected to display in the final tree.

| Name in tree    | GenBank accession no. | GH13 subfam. | aa no. of GH13.hmm | EC#               | Organism name                                       |
|-----------------|-----------------------|--------------|--------------------|-------------------|-----------------------------------------------------|
| AAA86836.1-34   | AAA86836.1            | 27           | 34-352             | 3.2.1.1           | <i>Pseudomonas</i> sp. KFCC10818                    |
| AAB00841.1-450  | AAB00841.1            | 39           | 450-795            | 3.2.1.1, 3.2.1.41 | <i>Thermoanaerobacterium thermosulfurigenes</i> EM1 |
| AAD54338.1-54   | AAD54338.1            | 7            | 54-341             | 3.2.1.1           | <i>Pyrococcus woesei</i>                            |
| AAN52525.1-51   | AAN52525.1            | 36           | 51-373             | 3.2.1.1           | <i>Halothermothrix orenii</i> H 168 H 168; DSM 9562 |
| AAR46454.1-113  | AAR46454.1            | 10           | 113-424            | 3.2.1.1           | <i>Sulfolobus solfataricus</i> KM1                  |
| AAS36537.1-377  | AAS36537.1            | none         | 1299-1639          | 3.2.1.1           | <i>Bacillus</i> sp. KSM-1378                        |
| AAS36537.1-1299 |                       | 12           | 377-691            | 3.2.1.41          |                                                     |
| AAS99099.1-78   | AAS99099.1            | 19           | 78-469             | 3.2.1.98          | <i>Bacillus halodurans</i> LBK 34                   |
| AAY89038.1-77   | AAY89038.1            | 32           | 1118-374           | 3.2.1.1           | <i>Bifidobacterium breve</i> UCC2003                |
| AAY89038.1-1118 |                       | 14           | 77-374             | 3.2.1.41          |                                                     |
| AEM89278.1-36   | AEM89278.1            | 37           | 36-345             | 3.2.1.1           | uncultured bacterium                                |
| AII00648.1-56   | AII00648.1            | 6            | 56-340             | 3.2.1.98          | <i>Coralloccoccus</i> sp. EGB                       |
| BAA02471.1-207  | BAA02471.1            | 21           | 207-548            | 3.2.1.1           | <i>Thermoactinomyces vulgaris</i> R-47              |
| BAA88434.1-226  | BAA88434.1            | 19           | 226-594            | 3.2.1.98          | <i>Klebsiella pneumoniae</i>                        |
| BAB04132.1-78   | BAB04132.1            | 19           | 78-469             | 3.2.1.98          | <i>Bacillus halodurans</i> C-125                    |
| BAB85635.1-46   | BAB85635.1            | 24           | 46-348             | 3.2.1.1           | <i>Anguilla japonica</i>                            |
| BLA-56          | P06278.1              | 5            | 56-403             | 3.2.1.1           | <i>Bacillus licheniformis</i> MD1                   |
| CAA39096.1-76   | CAA39096.1            | 19           | 76-467             | 3.2.1.98          | <i>Bacillus</i> sp. H-167                           |
| CAB06816.1-401  | CAB06816.1            | XX           | 401-835            | 3.2.1.1/3.2.1.98* | <i>Streptomyces lividans</i> TK24                   |
| MaAmyA-82       | AKG25402.1            | 32           | 82-370             | 3.2.1.1           | <i>Microbacterium aurum</i> B8A                     |
| MaAmyB-690      | XXXXX                 | XX           | 690-1121           | 3.2.1.98          | <i>Microbacterium aurum</i> B8A                     |
| P56634-32       | P56634                | 15           | 32-317             | 3.2.1.1           | <i>Tenebrio molitor</i>                             |
| PPA-49          | P00690.3              | 24           | 49-347             | 3.2.1.1           | <i>Sus scrofa</i>                                   |
| TAKA-60         | POC1B4.1              | 1            | 60-364             | 3.2.1.1           | <i>Aspergillus oryzae</i> RIB40                     |

\*AmlC, is currently listed as an  $\alpha$ -amylase (EC 3.2.1.1), but has not been characterized biochemically (see Discussion). Given the results found for MaAmyB as a member of this cluster, it is likely that also AmlC is actually an  $\alpha$ -glucan 1,4- $\alpha$ -maltohexaosidase (EC 3.2.1.98).



Table S2. Overview of the conserved regions found in GH13\_VV,  $\alpha$ -amylases that have a similar aberrant C-region as found in GH13\_42. The identity and similarity of these conserved regions are indicated for all homologs found, except those that belong to the GH13\_42 family. The ranges are given for the identity and similarity, as well as the average values, which are shown between brackets. The positions are based on [CQR58204.1](#), a predicted  $\alpha$ -amylase from *Paenibacillus riograndensis* SBR5, which was used as model sequence for GH13\_VV.

| Conserved region name | Position in <a href="#">CQR58204.1</a> | Insert size | Sequences found | Identity      | Similarity    |
|-----------------------|----------------------------------------|-------------|-----------------|---------------|---------------|
| GH13_VV Region-B      | 705-798                                | 94 aa       | 64              | 27-100% (70%) | 34-100% (75%) |
| Region-A, insert 1    | 858-876                                | 19 aa       | 65              | 28-100% (71%) | 33-100% (74%) |
| Region-A, insert 2    | 910-942                                | 33 aa       | 41*             | 67-100% (92%) | 70-100% (93%) |
| Aberrant C-region     | 1073-1138                              | 66 aa       | 70*             | 32-100% (76%) | 38-100% (84%) |

\* = region also found in GH13\_42 members.

Table S3. Overview of Stains, vectors and primers used during this study.

|                                                                                                        |                                                                      |
|--------------------------------------------------------------------------------------------------------|----------------------------------------------------------------------|
| Host strain                                                                                            | <i>Microbacterium aurum</i> B8.A                                     |
| Routine DNA manipulation strain                                                                        | <i>E.coli</i> TOP 10                                                 |
| Expression strain                                                                                      | <i>E.coli</i> C43                                                    |
| Expression vector                                                                                      | pBAD-VV (see <sup>3</sup> for details)                               |
| MaAmyB primers:                                                                                        |                                                                      |
| FW primer including DraIII restriction site (underlined)                                               | <u>GCCGGCACAGAGTGCTTGAGGTAGGCCG</u><br><u>TGCCGCTACCGATCTTG</u>      |
| RV primer including NdeI restriction site (underlined)                                                 | <u>CGTCTTCGACCTCCATATGCGAAGGAGC</u><br><u>AGGGTCTTGCGAGAAAGCACAC</u> |
| Sequence primer used for primer walking to find the last 24 nt of the initial (incomplete) MaAmyB gene | TCGGGCAACATGGCGTTC AAG                                               |

## References:

1. Lombard, V., Golaconda Ramulu, H., Drula, E., Coutinho, P. M. & Henrissat, B. The carbohydrate-active enzymes database (CAZy) in 2013. *Nucleic Acids Res.* **42**, D490–D495 (2014).
2. Valk, V., Lammerts van Bueren, A., van der Kaaij, R. M. & Dijkhuizen, L. Carbohydrate Binding Module 74 is a novel starch binding domain associated with large and multi-domain  $\alpha$ -amylase enzymes. *FEBS J.* **283**, 2354–2368 (2016).
3. Valk, V., Eeuwema, W., Sarian, F. D., van der Kaaij, R. M. & Dijkhuizen, L. Degradation of granular starch by the bacterium *Microbacterium aurum* strain B8.A involves a modular  $\alpha$ -amylase enzyme system with FNIII and CBM25 domains. *Appl. Environ. Microbiol.* **81**, 6610–6620 (2015).
